# Supplementary material for: GO-induced preparation of flake-shaped Na3V2(PO4)3@rGO as high-rate and long-life cathodes for sodium-ion batteries
Source: Royal Society of Chemistry journal article supplement (doi:10.1039/c7ta07943e), 2017-01-01
Supplement: c7ta07943e1.pdf [file c7ta07943e1.pdf]

Electronic Supplementary Information (ESI)

**GO induced preparation of flake-shaped  $\text{Na}_3\text{V}_2(\text{PO}_4)_3@\text{rGO}$  as  
high-rate and long-life cathodes for sodium-ion batteries**

Feng Li, Yuan-En Zhu, Jian Sheng, Leping Yang, Yue Zhang and Zhen Zhou\*

*School of Materials Science and Engineering, National Institute for Advanced Materials, Institute  
of New Energy Material Chemistry, Collaborative Innovation Center of Chemical Science and  
Engineering (Tianjin), Nankai University, Tianjin 300350, China.*

\*E-mail: [zhouzhen@nankai.edu.cn](mailto:zhouzhen@nankai.edu.cn)

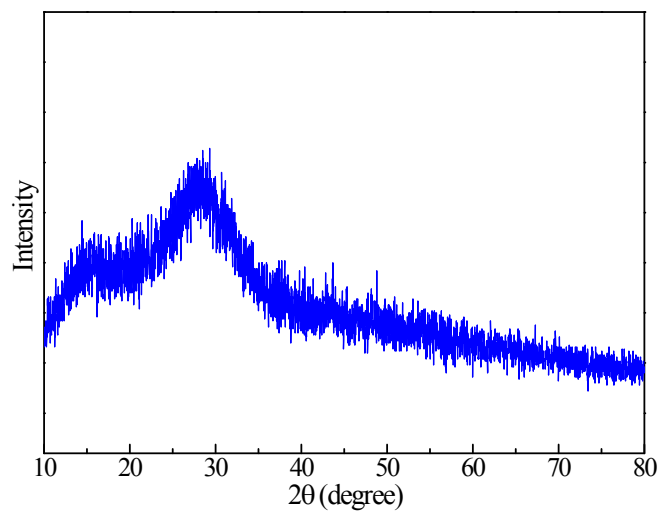

Figure S1 XRD patterns of the as-prepared precursors by a sol-gel route for the NVP@rGO composite.

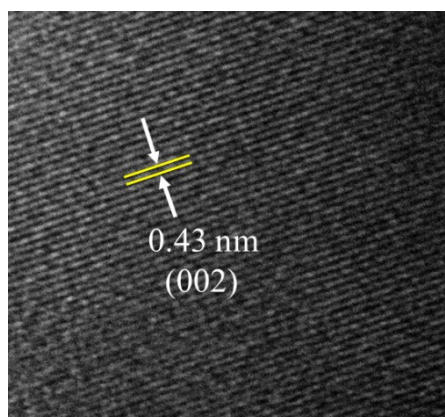

Figure S2 HRTEM images of bare NVP.

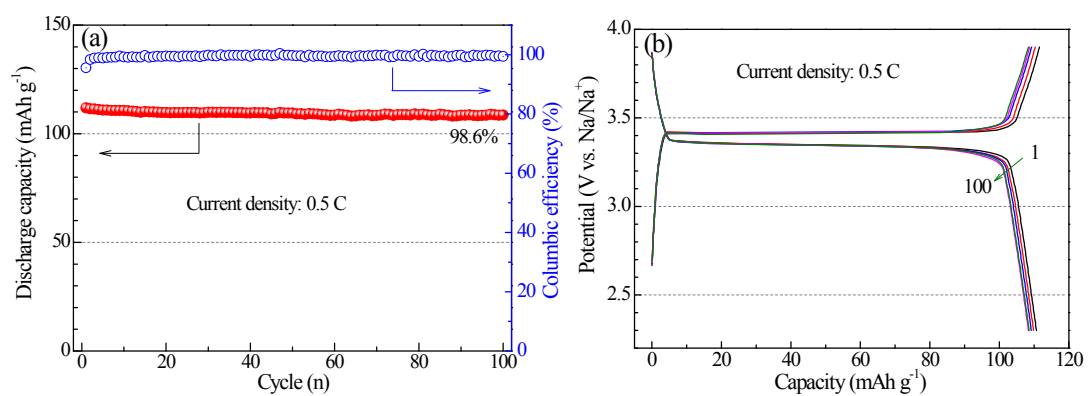

Figure S3 (a) The cyclic performance of the NVP@rGO electrode at 0.5 C and 25 °C and (b) the corresponding charge-discharge curves from the first to the 100th cycle.

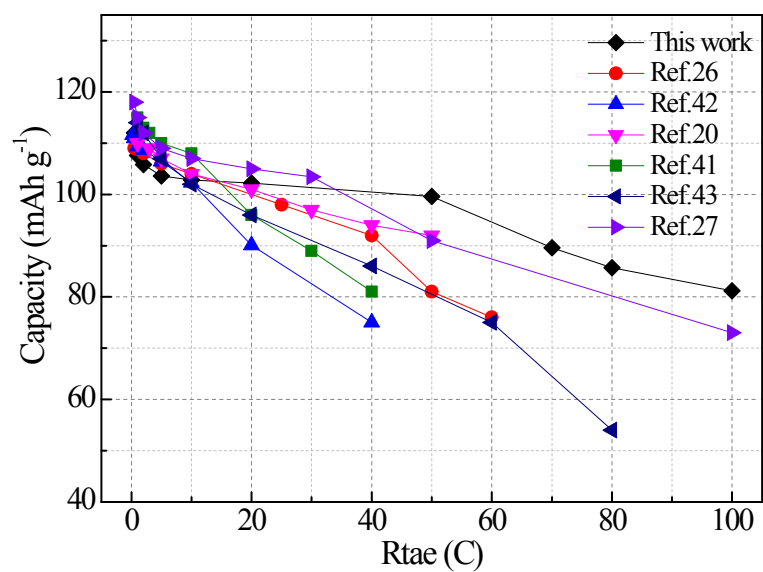

Figure S4 Comparison of rate performance of NVP@rGO in this work with those of recently reported NVP composites.

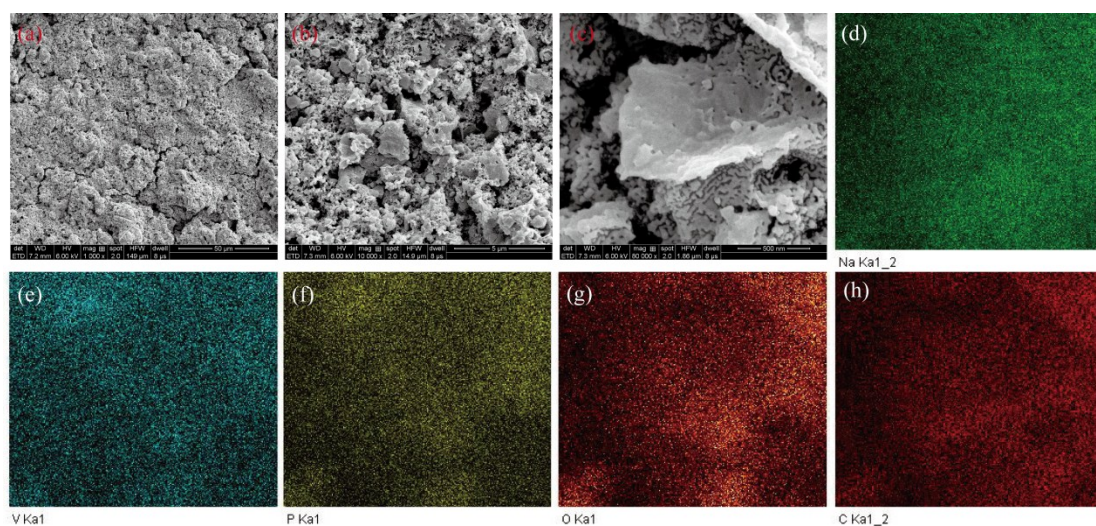

Figure S5 (a-c) SEM images of the cycled NVP@rGO electrode at 30 °C (at 25 °C) after 10000 cycles and (d-h) the corresponding EDS elemental mapping of Figure S5(c).

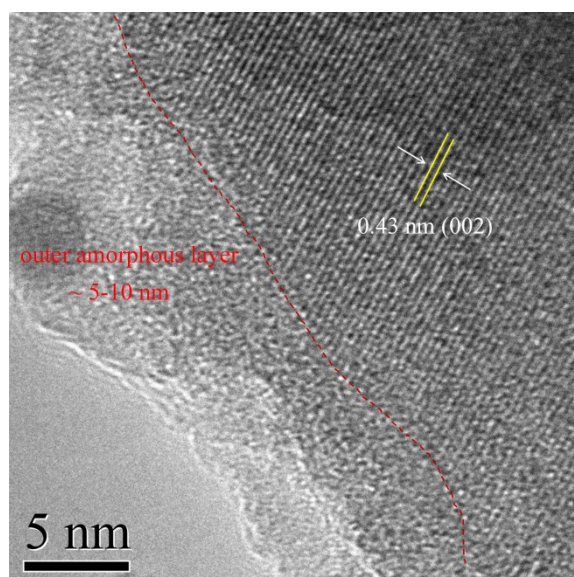

Figure S6 The HRTEM image of the cycled NVP@rGO electrode at 30 C after 10000 cycles at 25°C

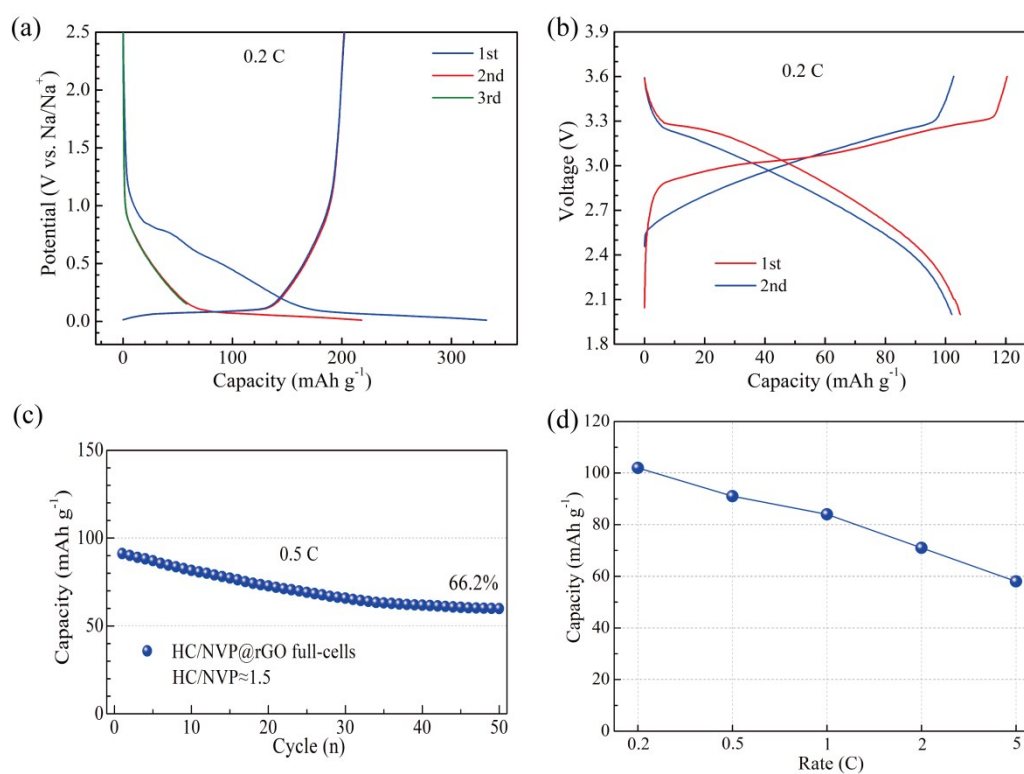

Figure S7 (a) The initial two discharge/charge curves of hard carbon at 0.2 C (60 mA g<sup>-1</sup>) within the range of 0.01-2.5 V vs. Na/Na<sup>+</sup>. The performance of sodium-ion full cells in the voltage range of 2-3.6 V; (b) the galvanostatic charge/discharge profiles of the initial two cycle at 0.2 C (1 C=118 mA h g<sup>-1</sup>); (c) the cycling performance at 0.5 C; (d) the rate capability from 0.2 C to 5 C.
